# Supplementary material for: Single-Cell DNA Sequencing and Immunophenotypic Profiling to Track Clonal Evolution in an Acute Myeloid Leukemia Patient
Source: MDPI journal article supplement (doi:10.3390/biomedicines12010066), 2023-12-27
Supplement: s1 [file s1]

# SUPPLEMENTARY MATERIALS

*Case Report*

## **Single-Cell DNA Sequencing and Immunophenotypic Profiling to Track Clonal Evolution in an Acute Myeloid Leukemia Patient.**

**María García-Álvarez <sup>1</sup>, Ana Yeguas <sup>2</sup>, Cristina Jiménez <sup>1</sup>, Alejandro Medina-Herrera <sup>1</sup>, Verónica González-Calle <sup>1</sup>, Montserrat Hernández-Ruano <sup>1</sup>, Rebeca Maldonado <sup>1</sup>, Irene Aires <sup>1</sup>, Cristina Casquero <sup>1</sup>, Inmaculada Sánchez-Villares <sup>1</sup>, Ana Balanzategui <sup>1</sup>, María Eugenia Sarasquete <sup>1</sup>, Miguel Alcoceba <sup>1</sup>, María Belén Vidriales <sup>1</sup>, Marcos González-Díaz <sup>1</sup>, Ramón García-Sanz <sup>1,\*</sup> and María Carmen Chillón <sup>1</sup>**

<sup>1</sup> Hematology Department, University Hospital of Salamanca (HUS/IBSAL), CIBERONC and Cancer Research Institute of Salamanca-IBMCC (USAL-CSIC), Salamanca, 37007, Spain

<sup>2</sup> Hematology Department, Complejo Asistencial Universitario de Palencia, Palencia, 34005, Spain

\* Correspondence: rgarcias@usal.es

## **CONTENTS:**

- 1. Materials and Methods**
- 2. Supplementary Tables**
- 3. Supplementary Figures**
- 4. References**

## **1. Material and methods**

### **Clinical samples**

Bone marrow (BM) aspirate and peripheral blood (PB) samples were collected on EDTA anticoagulant from the patient at diagnosis and relapse, respectively, after receipt of written informed consent approved by the local Ethical Committee, in accordance with Spanish law and the Declaration of Helsinki. Viable mononuclear cells from fresh BM (BMMCs) and PB (PBMCs) samples were purified using a separation by density gradient and frozen them on fetal bovine serum (FBS) containing 10% dimethyl sulfoxide (DMSO) at -80 °C.

Genomic DNA (gDNA) from fresh BM and PB samples were isolated by the automated DNA extractor Maxwell® 16 System (Promega, Madison, WI, USA).

### **Bulk targeted next-generation sequencing (NGS)**

Bulk targeted sequencing was performed with a custom Pan-Myeloid Panel (PMP), (SOPHiA GENETICS SA, Saint Sulpice, Switzerland), that covers 59 genes frequently mutated in myeloid pathology (Supplementary Table S1), starting from 200 ng gDNA.<sup>1</sup> Final libraries quantity was measured in a Qubit® 3.0 Fluorometer (Invitrogen™, Eugene, OR, USA), using the dsDNA HS (High Sensitivity) Assay kit, and libraries quality was assessed with a 4200 TapeStation (Agilent Technologies, Santa Clara, CA, USA) system, using the High Sensitivity D1000 assay. Libraries were then normalized, pooled, and 2x301 bp paired-end sequenced on a MiSeq platform (Illumina Inc., San Diego, CA, USA). Raw sequencing FASTQ files were analysed using SOPHiA DDM™ Platform, taking into account somatic single-nucleotide variants (SNVs) and small insertions/deletions (indels) with >300X reads and variant allele frequency ≥3%. Variants in the non-coding region, synonymous variants and single nucleotide polymorphisms (MAF>1%) were excluded.

### **Single-Cell DNA and Protein Sequencing**

Single-cell DNA and protein sequencing was performed using a novel tow-step microfluidic droplet workflow by Mission Bio Tapestri single-cell sequencing platform (Mission Bio, Inc., South San Francisco, CA, USA), according to the manufacturer's instructions.<sup>2</sup> We employed the Mission Bio's Tapestri Myeloid panel, which covering hotspot mutations in 45 genes (312 amplicons) commonly mutated in myeloid malignancies (Supplementary Table S2) for single-cell DNA sequencing. For protein sequencing, antibody-oligo conjugates (AOC) custom panel for targeting cell-surface proteins of interest were designed by us and manufactured by Mission Bio, Inc (Supplementary Table S3). Close to 825,000 thawed BMMCs and PBMCs were incubated with AOC pool for staining (30 min at room temperature), followed by three washes with Dulbecco's phosphate-buffered saline (DPBS) containing 5% FBS. Approximately 125,000 stained cells were resuspended in cell buffer for encapsulation, lysis, protein digest and cell barcoding on the Tapestri platform. Then, targeted DNA region and antibody-oligo tag were amplified by incubating barcoded DNA emulsion in a thermocycler. Emulsions were broken and PCR product was cleaned by enzymatic digest. DNA was purified with 0.7X AMPure XP reagent (Beckman Coulter, Pasadena, CA, USA), which allowed us to separate DNA targets bound to pelleted beads from the antibody DNA tags retained in the supernatant. The supernatant was incubated

with a biotinylated capture oligo at 96°C for 5 min, transferred immediately to ice for 5 min and captured with streptavidin beads (Dynabead MyOne Streptavidin C1, Thermo Fisher). Then, we amplified DNA libraries with Mission Bio V2 Index Primers and protein libraries bound to streptavidin beads with i5 and i7 index primers in the thermocycler. Finally, libraries were purified with 0.69X and 0.9X AMPure XP reagent (Beckman Coulter), respectively, and their quality was assessed with a 4200 TapeStation (Agilent Technologies) system, using the High Sensitivity D1000 assay. Libraries were quantified with Qubit® 3.0 Fluorometer, pooled and 2x150-bp paired-end sequenced on a NextSeq 1000 (Illumina, Inc.). A 10% ratio of PhiX DNA was used in the sequencing runs. FASTQ files were processed by Tapestry pipeline (Mission Bio, Inc.) and the resulting .loom and .h5 files were visualized using the Tapestry Insights software package and analysed by specific python scripts. After quality filtering, we considered non-synonymous variants in coding regions and genotyped in >80% of cells. The amplicons that targeted the *FLT3* gene could not be individually covered the ITD (21 bp) of this case, requiring the combination of three amplicons for covering and detecting the complete ITD.

#### Multiparameter flow cytometry (MFC)

BM aspirate from diagnosis was collected on EDTA and 200 µl were stained using the acute leukaemia orientation tube (ALOT) and the seven EuroFlow (EF) acute myeloid leukaemia (AML)/myelodysplastic syndrome (MDS) antibody panel.<sup>3</sup> Sample processing and sample acquisition were carried out according to EF standard protocol.<sup>4</sup> Stained cells were measured in FACSCanto II flow cytometer (BD Bioscience, San Jose, CA, USA), equipped with FACSDiva™ software (BD Bioscience). Data were analysed by Infinicyt v2.0 software (Cytognos, Salamanca, Spain). Thawed BMMCs and PBMCs, from diagnosis and relapse respectively, were resuspended in 200 µl of phosphate-buffered saline (PBS) and stained with a specific antibody panel (Supplementary Table S4). This antibody panel was designed based on diagnosis BM phenotype and antibodies included in AOC custom panel for single-cell analysis. After staining, cell pellet was washed with PBS, centrifuged (5 min at 2000 rpm) and finally resuspended in 200 µl of PBS, and measured in FACSCanto II flow cytometer (BD Bioscience) at a medium flow rate mode. Data were analysed by Infinicyt v2.0 software (Cytognos).

## 2. Supplementary tables

**Table S1.** Pan-Myeloid Panel (PMP) target regions per gene. PMP panel design includes a total of 59 genes for SNV and indels.

| GENE             | Cytoband     | NM_            | EXONS Target Region           |
|------------------|--------------|----------------|-------------------------------|
| <i>ACD</i>       | 16q22.1      | NM_022914      | CDS                           |
| <i>ANKRD26</i>   | 10p12.1      | NM_014915      | 5'UTR + exons 1-2             |
| <i>ASXL1</i>     | 20q11.21     | NM_015338.5    | exon 13                       |
| <i>ATG2B</i>     | 14q32.2      | NM_018036      | exons 28,29,30,31,32,33       |
| <i>ATRX</i>      | Xq21.1       | NM_000489.4    | exons 8-10, 17-31             |
| <i>BCOR</i>      | Xp11.4       | NM_001123385   | CDS                           |
| <i>BCORL1</i>    | Xq26.1       | NM_021946      | CDS                           |
| <i>CALR</i>      | 19p13.13     | NM_004343.3    | exon 9                        |
| <i>CBL</i>       | 11q23.3-qter | NM_005188.3    | exons 8-9                     |
| <i>CEBPA</i>     | 19q13.1      | NM_004364.4    | CDS                           |
| <i>CSF3R</i>     | 1p35-p34.3   | NM_156039      | exons 14-17                   |
| <i>CSNK1A1</i>   | 5q32         | NM_001025105   | CDS                           |
| <i>CUX1</i>      | 7q22.1       | NM_001202543   | CDS                           |
| <i>DDX41</i>     | 5q35.3       | NM_016222      | CDS                           |
| <i>DHX34</i>     | 19q13.32     | NM_014681      | exons 2-17                    |
| <i>DNMT3A</i>    | 2p23.3       | NM_175629.2    | CDS                           |
| <i>ETNK1</i>     | 12p12.1      | NM_018638.4    | exon 3                        |
| <i>ETV6</i>      | 12p13.2      | NM_001987.4    | CDS                           |
| <i>EZH2</i>      | 7q35-q36     | NM_004456.4    | CDS                           |
| <i>FLT3</i>      | 13q12.2      | NM_004119.2    | exons 11-20                   |
| <i>GATA1</i>     | Xp11.23      | NM_002049.3    | exon 2                        |
| <i>GATA2</i>     | 3q21.3       | NM_032638.4    | CDS                           |
| <i>GSKIP</i>     | 14q32.2      | NM_016472      | CDS                           |
| <i>IDH1</i>      | 2q32-qter    | NM_001282387   | exon 4                        |
| <i>IDH2</i>      | 15q21-qter   | NM_002168.3    | exon 4                        |
| <i>IKZF1</i>     | 7p12.2       | NM_006060.5    | CDS                           |
| <i>JAK2</i>      | 9p24.1       | NM_004972.3    | exons 12-15                   |
| <i>KIT</i>       | 4q11-q12     | NM_000222.2    | exons 2, 8-11, 13, 14, 17, 18 |
| <i>KMT2A</i>     | 11q23.3      | NM_001197104.1 | CDS                           |
| <i>KRAS</i>      | 12p12.1      | NM_033360      | exons 2-4                     |
| <i>MBD4</i>      | 3q21.3       | NM_003925      | CDS                           |
| <i>MECOM</i>     | 3q26.2       | NM_004991      | CDS                           |
| <i>MPL</i>       | 1p34.2       | NM_005373.2    | exons 3-6,10,12               |
| <i>NF1</i>       | 17q11.2      | NM_001042492   | CDS                           |
| <i>NPM1</i>      | 5q35.1       | NM_002520.6    | exons 10, 11                  |
| <i>NRAS</i>      | 1p13.2       | NM_002524.4    | exons 2-4                     |
| <i>PHF6</i>      | Xq26.2       | NM_032458      | CDS                           |
| <i>PPM1D</i>     | 17q23.2      | NM_003620      | CDS                           |
| <i>PTPN11</i>    | 12q24.13     | NM_002834.3    | exons 3, 7, 13                |
| <i>RAD21</i>     | 8q24.11      | NM_006265.2    | CDS                           |
| <i>RUNX1</i>     | 21q22.3      | NM_001754.4    | CDS                           |
| <i>SAMD9</i>     | 7q21.2       | NM_017654      | CDS                           |
| <i>SAMD9L</i>    | 7q21.2       | NM_152703      | CDS                           |
| <i>SETBP1</i>    | 18q21.1      | NM_015559.2    | aa850-928 of exon 4           |
| <i>SF3B1</i>     | 2q33.1       | NM_012433.2    | exons 11-16                   |
| <i>SH2B3/LNK</i> | 12q24.12     | NM_005475      | CDS                           |
| <i>SMC1A</i>     | Xp11.22      | NM_006306      | exons 2,11,16,17              |
| <i>SMC3</i>      | 10q25.2      | NM_005445      | exons 10, 13, 19, 23, 25, 28  |
| <i>SRP72</i>     | 4q12         | NM_006947      | CDS                           |

|              |         |                |            |
|--------------|---------|----------------|------------|
| <b>SRSF2</b> | 17q25.1 | NM_003016.4    | CDS        |
| <b>STAG2</b> | Xq25    | NM_001042749.2 | CDS        |
| <b>TCL1A</b> | 14q32.2 | NM_021966      | CDS        |
| <b>TERC</b>  | 3q26.2  | NR_001566      | Full       |
| <b>TERT</b>  | 5p15.33 | NM_198253      | CDS        |
| <b>TET2</b>  | 4q24    | NM_001127208   | CDS        |
| <b>TP53</b>  | 17p13.1 | NM_000546.5    | CDS        |
| <b>U2AF1</b> | 21q22.3 | NM_006758      | exons 2, 6 |
| <b>WT1</b>   | 11p13   | NM_024426.4    | exons 7, 9 |
| <b>ZRSR2</b> | Xp22.1  | NM_005089.3    | CDS        |

**Table S2.** Mision Bio's Tapestri 45-gene myeloid panel

|               |              |              |               |              |
|---------------|--------------|--------------|---------------|--------------|
| <i>ASXL1</i>  | <i>ERG</i>   | <i>KDM6A</i> | <i>NRAS</i>   | <i>SMC1A</i> |
| <i>ATM</i>    | <i>ETV6</i>  | <i>KIT</i>   | <i>PHF6</i>   | <i>SMC3</i>  |
| <i>BCOR</i>   | <i>EZH2</i>  | <i>KMT2A</i> | <i>PPM1D</i>  | <i>STAG2</i> |
| <i>BRAF</i>   | <i>FLT3</i>  | <i>KRAS</i>  | <i>PTEN</i>   | <i>STAT3</i> |
| <i>CALR</i>   | <i>GATA2</i> | <i>MPL</i>   | <i>PTPN11</i> | <i>TET2</i>  |
| <i>CBL</i>    | <i>GNAS</i>  | <i>MYC</i>   | <i>RAD21</i>  | <i>TP53</i>  |
| <i>CHEK2</i>  | <i>IDH1</i>  | <i>MYD88</i> | <i>RUNX1</i>  | <i>U2AF1</i> |
| <i>CSF3R</i>  | <i>IDH2</i>  | <i>NF1</i>   | <i>SETBP1</i> | <i>WT1</i>   |
| <i>DNMT3A</i> | <i>JAK2</i>  | <i>NPM1</i>  | <i>SF3B1</i>  | <i>ZRSR2</i> |

**Table S3.** Custom AOC panel

|       |       |      |        |
|-------|-------|------|--------|
| CD11b | CD117 | CD33 | CD45   |
| CD13  | CD123 | CD34 | CD64   |
| CD14  | CD3   | CD38 | HLA-DR |

**Table S4.** Antibody panel employed for the evaluation of the BMBCs and PBMCs. The different colours represent the fluorescence colour emitted by each fluorochrome.

| Tube | FITC                                                   | PE                                                   | PerCPy5.5                                            | PECy7                                                      | APC                                                      | APC-H7                                               | V450                                                   | OC515                                             |
|------|--------------------------------------------------------|------------------------------------------------------|------------------------------------------------------|------------------------------------------------------------|----------------------------------------------------------|------------------------------------------------------|--------------------------------------------------------|---------------------------------------------------|
| 1    | <b>CD15</b><br>Clone MMA<br>BD Bioscience<br>(5 µl)    | <b>CD13</b><br>Clone L138<br>BD Bioscience<br>(5 µl) | <b>CD34</b><br>Clone 8G12<br>BD Bioscience<br>(5 µl) | <b>CD117</b><br>Clone 104D2D1<br>Beckman Coulter<br>(5 µl) | <b>CD33</b><br>Clone P67.6<br>BD Bioscience<br>(10 µl)   | <b>CD38</b><br>Clone HB7<br>BD Bioscience<br>(3 µl)  | <b>HLA-DR</b><br>Clone L243<br>BD Bioscience<br>(5 µl) | <b>CD45</b><br>Clone HI30<br>Immunostep<br>(5 µl) |
| 2    | <b>CD15</b><br>Clone MMA<br>BD Bioscience<br>(5 µl)    | <b>CD64</b><br>Clone 22<br>Cytognos<br>(10 µl)       | <b>CD34</b><br>Clone 8G12<br>BD Bioscience<br>(5 µl) | <b>CD117</b><br>Clone 104D2D1<br>Beckman Coulter<br>(5 µl) | <b>CD11b</b><br>Clone D12<br>BD Bioscience<br>(5 µl)     | <b>CD14</b><br>Clone MøP9<br>BD Bioscience<br>(5 µl) | <b>HLA-DR</b><br>Clone L243<br>BD Bioscience<br>(5 µl) | <b>CD45</b><br>Clone HI30<br>Immunostep<br>(5 µl) |
| 3    | <b>CD16</b><br>Clone 3G8<br>Beckman Coulter<br>(20 µl) | <b>CD13</b><br>Clone L138<br>BD Bioscience<br>(5 µl) | <b>CD34</b><br>Clone 8G12<br>BD Bioscience<br>(5 µl) | <b>CD117</b><br>Clone 104D2D1<br>Beckman Coulter<br>(5 µl) | <b>CD123</b><br>Clone AC145<br>Miltenyi Biotec<br>(2 µl) | <b>CD3</b><br>Clone SK7<br>BD Bioscience<br>(5 µl)   | <b>HLA-DR</b><br>Clone L243<br>BD Bioscience<br>(5 µl) | <b>CD45</b><br>Clone HI30<br>Immunostep<br>(5 µl) |

### 3. Supplementary figures

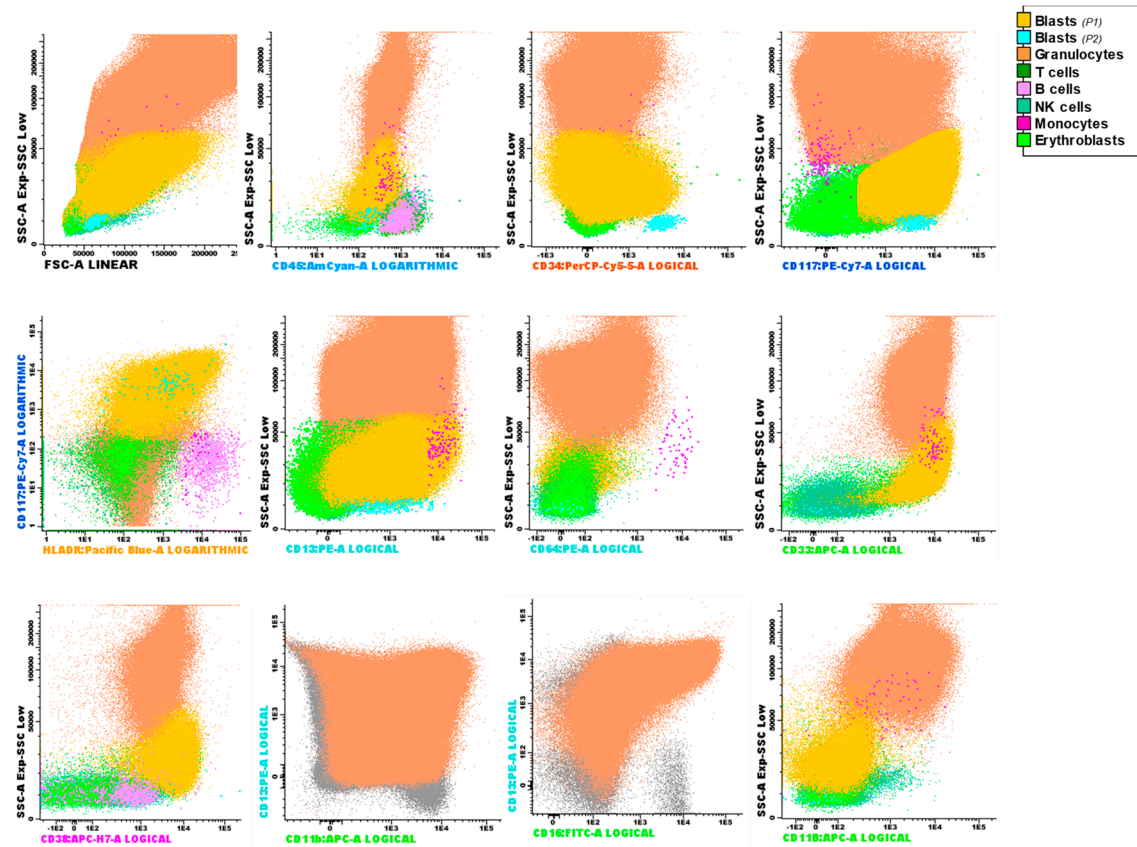

**Figure S1.** Immunophenotypic features of the different populations identified at the time of diagnosis by multiparameter flow cytometry in bone marrow sample, according to EuroFlow standard protocols.

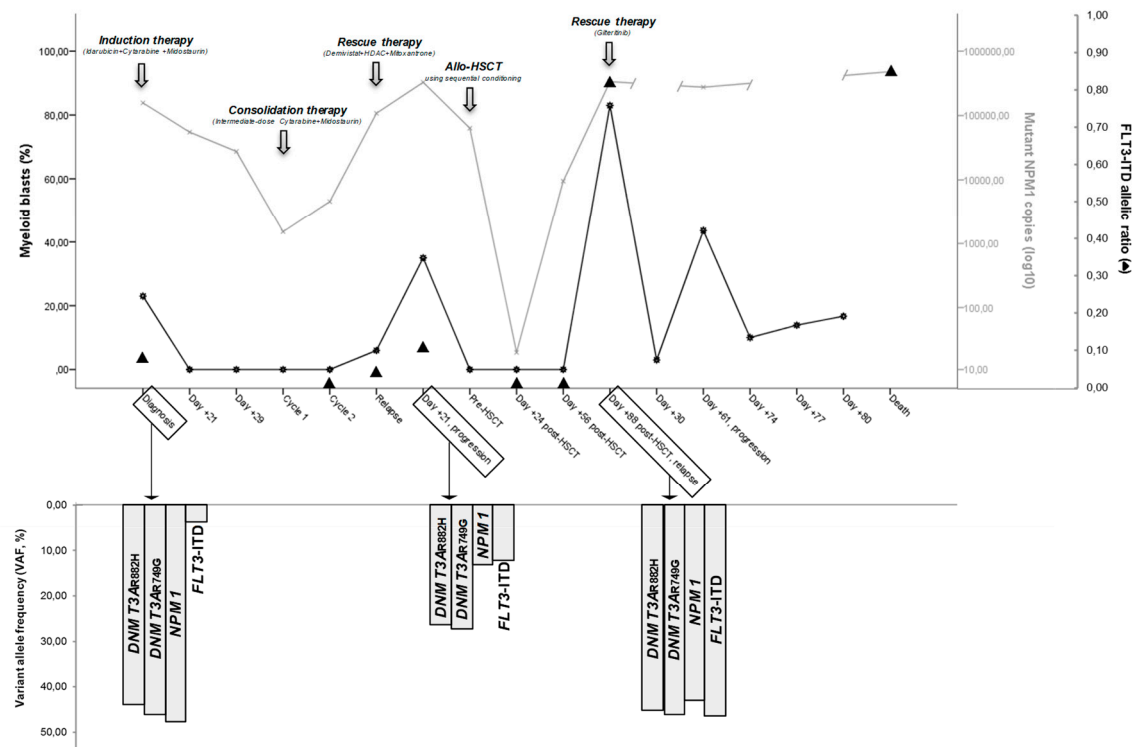

**Figure S2.** Progression of the percentage of blasts (black line), number of *NPM1* copies (grey line) and *FLT3*-ITD allelic ratio (black triangle) in time. At the bottom of the graph is represented the variant allele frequency of different mutations detected by NGS in three time points.

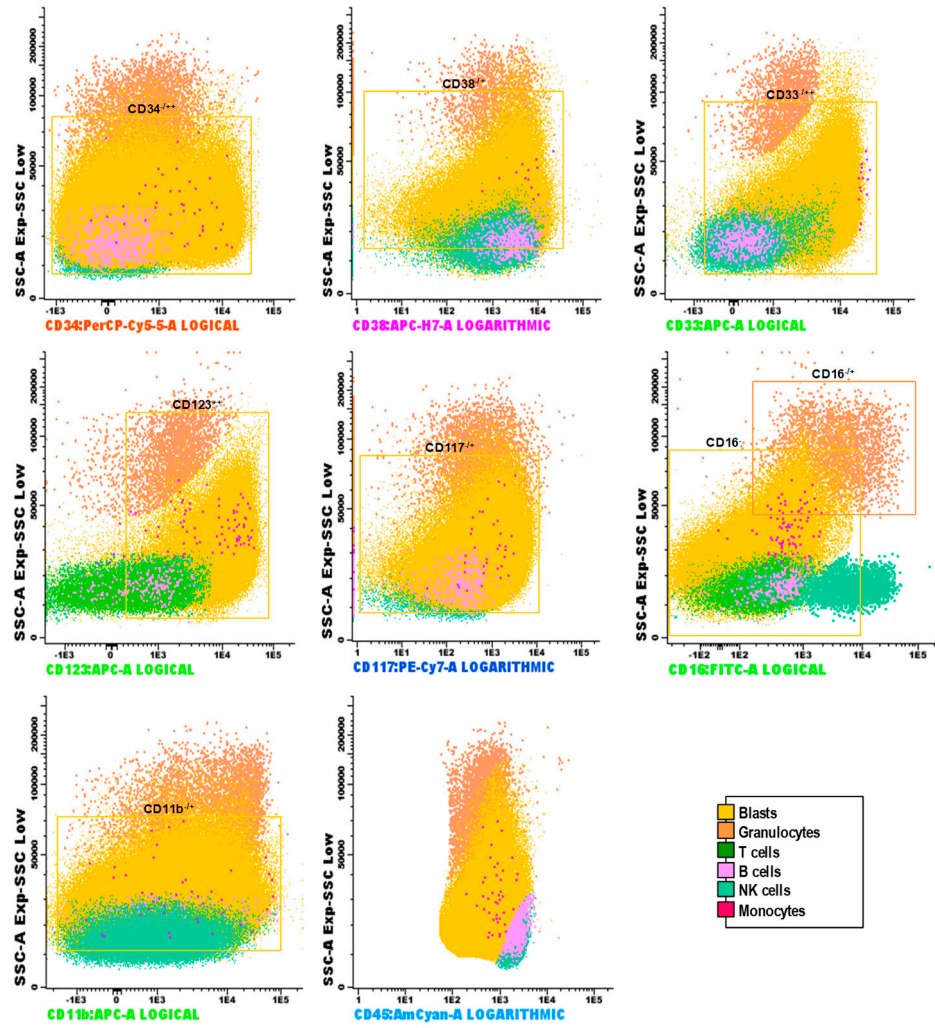

**Figure S3.** Immunophenotypic features of the different populations identified at the time of relapse by multiparameter flow cytometry in peripheral blood sample using antibody custom panel described in Table S4.

#### 4. References

1. Aguilera-Diaz A, Vazquez I, Ariceta B, et al. Assessment of the clinical utility of four NGS panels in myeloid malignancies. Suggestions for NGS panel choice or design. *PLoS One* 2020;15(1):e0227986.
2. Pellegrino M, Sciambi A, Treusch S et al. High-throughput single-cell DNA sequencing of acute myeloid leukemia tumors with droplet microfluidics. *Genome Res* 2018;28:1345-1352.
3. van Dongen JJ, Lhermitte L, Böttcher S et al. EuroFlow antibody panels for standardized n-dimensional flow cytometric immunophenotyping of normal, reactive and malignant leukocytes. *Leukemia* 2012;26:1908-1975.
4. Kalina T, Flores-Montero J, van dV, V et al. EuroFlow standardization of flow cytometer instrument settings and immunophenotyping protocols. *Leukemia* 2012;26:1986-2010.
